# Supplementary material
Source: Springer Nature journal article supplement (https://www.springermedizin.de/resource/supplementary/13584_2011_22_MOESM4_ESM.pdf/9676806)

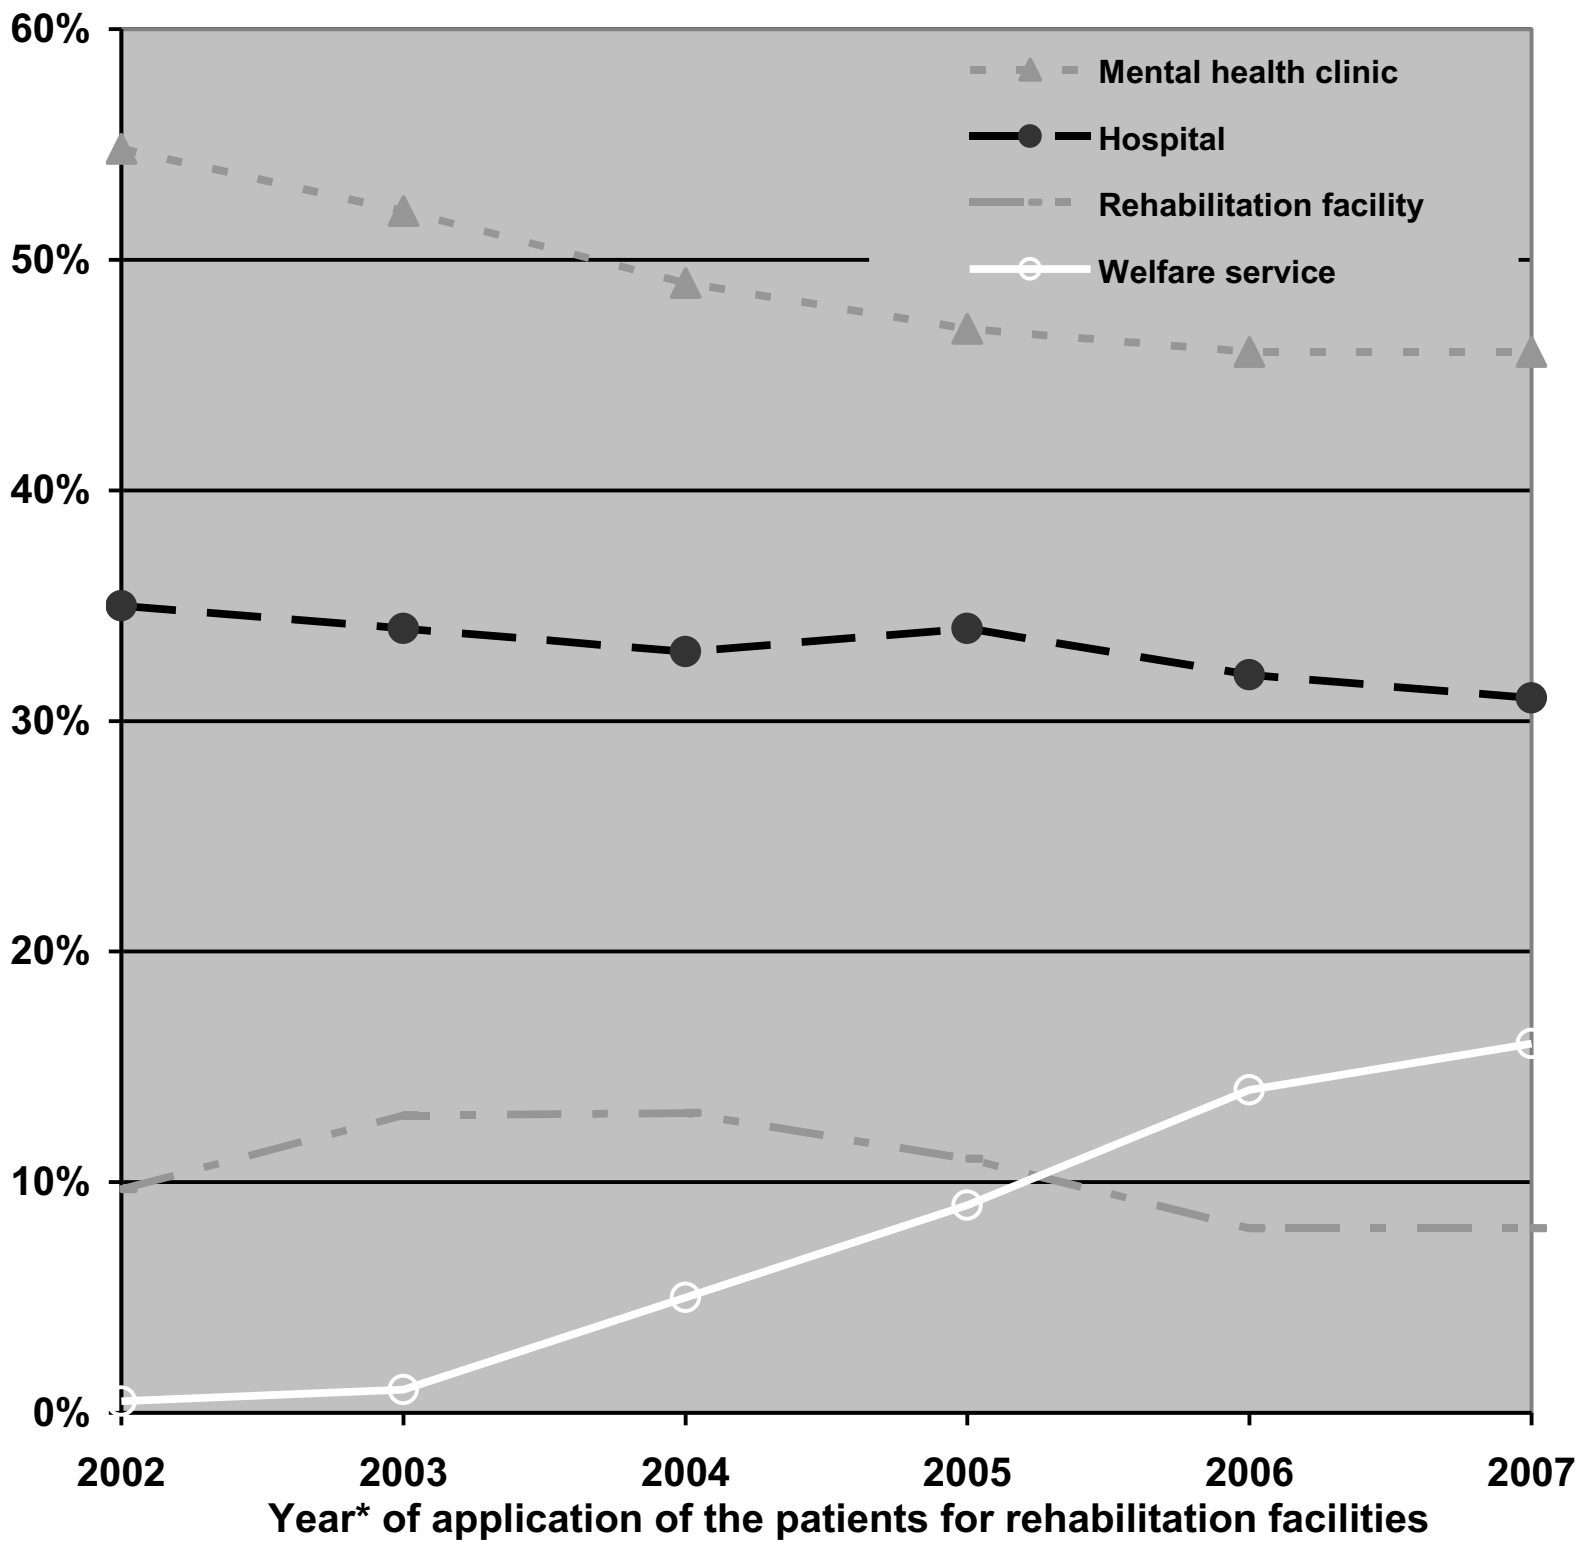

Supplement: MOESM4 [file 9676806]
